# Supplementary material for: CLImAT-HET: detecting subclonal copy number alterations and loss of heterozygosity in heterogeneous tumor samples from whole-genome sequencing data
Source: PubMed Central journal article supplement (PMC5351278; doi:10.1186/s12920-017-0255-4), 2017-03-15
Supplement: 12920_2017_255_MOESM1_ESM.pdf [file 12920_2017_255_MOESM1_ESM.pdf]

**Table S1.** Definition of copy number aberration states in CLImAT-HET

| State | Copy number | (Tumor genotype, normal genotype)                      | Aberration status |
|-------|-------------|--------------------------------------------------------|-------------------|
| 1     | 0           | (N/A, AA), (N/A, BB), (N/A, AB)                        | HOMD              |
| 2     | 1           | (A,AA), (B,BB), (A,AB), (B,AB)                         | HEMD              |
| 3     | 2           | (AA,AA), (BB,BB), (AB,AB)                              | NHET              |
| 4     | 2           | (AA,AA), (AA,AB), (BB,BB), (BB,AB)                     | NLOH              |
| 5     | 3           | (AAA,AA), (BBB,BB), (AAB,AB), (ABB,AB)                 | AHET              |
| 6     | 3           | (AAA,AA), (AAA,AB), (BBB,BB), (BBB,AB)                 | ALOH              |
| 7     | 4           | (AAAA,AA), (BBBB,BB), (AAAB,AB), (ABBB,AB)             | AHET              |
| 8     | 4           | (AAAA,AA), (BBBB,BB), (AABB,AB)                        | AHET              |
| 9     | 4           | (AAAA,AA), (BBBB,BB), (AAAA,AB), (BBBB,AB)             | ALOH              |
| 10    | 5           | (AAAAA,AA), (BBBBB,BB), (AAAAB,AB), (ABBBB,AB)         | AHET              |
| 11    | 5           | (AAAAA,AA), (BBBBB,BB), (AAABB,AB), (AABBB,AB)         | AHET              |
| 12    | 5           | (AAAAA,AA), (BBBBB,BB), (AAAAA,AB), (BBBBB,AB)         | ALOH              |
| 13    | 6           | (AAAAAA,AA), (BBBBBB,BB), (AAAAAB,AB), (ABBBBB,AB)     | AHET              |
| 14    | 6           | (AAAAAA,AA), (BBBBBB,BB), (AAAABB,AB), (AABBBB,AB)     | AHET              |
| 15    | 6           | (AAAAAA,AA), (BBBBBB,BB), (AAABBB,AB)                  | AHET              |
| 16    | 6           | (AAAAAA,AA), (BBBBBB,BB), (AAAAAA,AB), (BBBBBB,AB)     | ALOH              |
| 17    | 7           | (AAAAAAA,AA), (BBBBBBB,BB), (AAAAAAB,AB), (ABBBBBB,AB) | AHET              |
| 18    | 7           | (AAAAAAA,AA), (BBBBBBB,BB), (AAAAABB,AB), (AABBBBB,AB) | AHET              |
| 19    | 7           | (AAAAAAA,AA), (BBBBBBB,BB), (AAAABBB,AB), (AAABBBB,AB) | AHET              |
| 20    | 7           | (AAAAAAA,AA), (BBBBBBB,BB), (AAAAAAA,AB), (BBBBBBB,AB) | ALOH              |
